# Supplementary material for: Negative Impact on Growth and Photosynthesis in the Green Alga Chlamydomonas reinhardtii in the Presence of the Estrogen 17α-Ethynylestradiol
Source: PLoS One. 2014 Oct 13;9(10):e109289. doi: 10.1371/journal.pone.0109289 (PMC4195650; doi:10.1371/journal.pone.0109289)
Supplement: Dataset S1 — The file contains the datasets from the experimental work for this paper as an excel file with labeled tabs indicating which figure each set was used for. (XLS) [file pone.0109289.s002.xls]

## Sheet: Figure 1
Batch growth doubling times
	Run #	Control	10pM	100 pM	1 nM	100 nM	10 µM
	1	22.7508	26.2902	30.9901	30.2268	29.603	33.1142
	2	24	25.57	26.7998	23.522	25.0669	28.5159
	3	22.5536	28.3591	30.5884	29.4679	25.9915	24.1545
	4	21.6541	26.2834	29.7267	27.3402
	Avg	22.7396	26.6257	29.5262	27.6393	26.8871	28.5949
	SE	0.557925	0.69512	1.09266	1.73463	1.69494	3.16808
	% of control	1	1.17089	1.29845	1.21547	1.18239	1.25749

## Sheet: Table 1
Turbidostat growth doubling times
	Doubling time (h)
		High Ci	Low Ci	High+EE2	Low+EE2
		14.0206	12.6933	17.0312	42.7111
		13.6759	19.1067	19.1071	29.6552
		12.6316	15.5755	30.5739	30.5739
		13.9216		24.6629	35.2615
		14.6154
		12.936
		13.4667
	Average	13.6097	15.7918	22.8438	34.5504
	SE	0.274517	2.27132	4.2111	4.20722

## Sheet: Table 2
Turbidostat growth Fv/Fm-data
	Fv/Fm
		High Ci	Low Ci	High+EE2	Low+EE2
		0.8125	0.804348	0.784615	0.724138
		0.816901	0.84	0.675676	0.62963
		0.846154	0.796296	0.692308	0.62963
		0.826087	0.819672	0.707317	0.6
	Average	0.825411	0.815079	0.714979	0.645849
	SE	0.00862702	0.0111061	0.0278222	0.0311937

## Sheet: Figures 3 and 4
Raw data and compiled averages + SE for Control (no EE2) and cells grown in the presence of EE2
	Control
		Vmax	Low Ci	Low Ci+AZ	Low Ci+EZ		High Ci	High Ci+AZ	High Ci+EZ
			131.1	124.9	76.79		110.4	159.2	103.5
			117.3	130.1	95.71		139.9	146.2	94.21
			120.5	102.3	90.08		116.7	122.2	74.67
			126.1	141.7	109.4		170.8
							150
		Average	123.75	124.75	92.995		137.56	142.533	90.7933
		SE	3.5231	9.54492	7.80025		12.3439	13.2728	10.4055
		kM	Low Ci	Low Ci+AZ	Low Ci+EZ		High Ci	High Ci+AZ	High Ci+EZ
			2.366e-05	3.905e-05	0.0002246		6.054e-05	8.114e-05	0.0002385
			1.857e-05	6.018e-05	0.0002779		5.488e-05	9.286e-05	0.0001939
			2.694e-05	3.998e-05	0.00022		5.12e-05	5.063e-05	0.0002239
			2.72e-05	6.84e-05	6.29e-05		7.022e-05
							7.02e-05
		Average	2.40925e-05	5.19025e-05	0.00019635		6.1408e-05	7.48767e-05	0.000218767
		SE	2.3202e-06	8.48539e-06	5.35586e-05		4.34829e-06	1.54153e-05	1.60788e-05
		Low Ci				High Ci
		Vmax	SE	kM	SE	Vmax	SE	kM	SE
	Control	123.75	3.5231	2.40925e-05	2.3202e-06	137.56	12.3439	6.1408e-05	4.34829e-06
	+AZ	124.75	9.54492	5.19025e-05	8.48539e-06	142.533	13.2728	7.48767e-05	1.54153e-05
	+EZ	92.995	7.80025	0.00019635	5.35586e-05	90.7933	10.4055	0.000218767	1.60788e-05
	Estrogen
		Vmax	Low Ci	Low Ci+AZ	Low Ci+EZ		High Ci	High Ci+AZ	High Ci+EZ
			97.79	130.4	82.6		148.3	146.3	112.9
			118.6	141.1	107.9		142.9	165.5	91.41
			149.4	159	142.6		131	151.4	93.61
		Average	121.93	143.5	111.033		140.733	154.4	99.3067
		SE	18.3605	10.2179	21.2998		6.25873	7.03242	8.36044
		kM	Low Ci	Low Ci+AZ	Low Ci+EZ		High Ci	High Ci+AZ	High Ci+EZ
			1.297e-05	0.0001213	0.0003029		8.441e-05	8.2e-05	0.0003408
			7.317e-06	2.756e-05	0.0002495		6.898e-05	0.0001163	0.0002387
			1.923e-05	2.849e-05	0.0004105		2.671e-05	5.867e-05	0.0003254
		Average	1.31723e-05	5.91167e-05	0.000320967		6.00333e-05	8.56567e-05	0.000301633
		SE	4.2137e-06	3.80808e-05	5.79873e-05		2.11229e-05	2.0498e-05	3.89214e-05
		Low Ci				High Ci
		Vmax	SE	kM	SE	Vmax	SE	kM	SE
	Control	121.93	18.3605	1.31723e-05	4.2137e-06	140.733	6.25873	6.00333e-05	2.11229e-05
	+AZ	143.5	10.2179	5.91167e-05	3.80808e-05	154.4	7.03242	8.56567e-05	2.0498e-05
	+EZ	111.033	21.2998	0.000320967	5.79873e-05	99.3067	8.36044	0.000301633	3.89214e-05
